# Supplementary material for: Flow cytometry identifies changes in peripheral and intrathecal lymphocyte patterns in CNS autoimmune disorders and primary CNS malignancies
Source: PubMed Central journal article supplement (PMC11536547; doi:10.1186/s12974-024-03269-3), 2024-11-04
Supplement: 12974_2024_3269_MOESM2_ESM.pdf [file 12974_2024_3269_MOESM2_ESM.pdf]

### Diagnostic criteria of ALE (Graus et al. <sup>1</sup>)

| Possible ALE                                                                                                                                                         | Probable ALE                                                                                                                                                                                                                                   | Definitive ALE                                                                                                                                                                |
|----------------------------------------------------------------------------------------------------------------------------------------------------------------------|------------------------------------------------------------------------------------------------------------------------------------------------------------------------------------------------------------------------------------------------|-------------------------------------------------------------------------------------------------------------------------------------------------------------------------------|
| 1. Subacute onset (< 3 month) of memory deficits, psychiatric symptoms or altered mental status                                                                      | 1. Subacute onset (< 3 month) of memory deficits, psychiatric symptoms or altered mental status                                                                                                                                                | 1. Subacute onset (< 3 months) of seizures, working memory deficits, or psychiatric symptoms                                                                                  |
| 2. New focal CNS signs ± new onset seizures ± CSF pleocytosis ± hyperintense signal on T2-FLAIR MRI sequences highly restricted to one or both medial temporal lobes | 2. CSF pleocytosis ± elevated CSF IgG index ± CSF-specific ocbs ± hyperintense signal on T2-FLAIR MRI sequences highly restricted to one or both medial temporal lobes ± biopsy showing inflammatory infiltrates and excluding other disorders | 2. Hyperintense signal on T2-FLAIR MRI sequences highly restricted to both medial temporal lobes                                                                              |
| 3. Exclusion of reasonable differential diagnoses                                                                                                                    | 3. Exclusion of reasonable differential diagnoses                                                                                                                                                                                              | 3. CSF pleocytosis ± EEG with epileptiform or slow-wave activity involving the medial temporal lobes of both hemispheres<br>4. Exclusion of reasonable differential diagnoses |

### Diagnostic criteria of RRMS (Thompson et al. <sup>2</sup>)

| Clinical attacks     | Number of lesions with objective clinical evidence                                                                     | Additional data needed for a diagnosis of multiple sclerosis                                                                                                                                                                               |
|----------------------|------------------------------------------------------------------------------------------------------------------------|--------------------------------------------------------------------------------------------------------------------------------------------------------------------------------------------------------------------------------------------|
| ≥ 2 clinical attacks | ≥ 2                                                                                                                    | None                                                                                                                                                                                                                                       |
|                      | 1 (as well as clear-cut historical evidence of a previous attack involving a lesion in a distinct anatomical location) | None                                                                                                                                                                                                                                       |
| 1 clinical attack    | 1                                                                                                                      | Dissemination in space demonstrated by an additional clinical attack implicating a different CNS site or by MRI                                                                                                                            |
|                      | ≥ 2                                                                                                                    | Dissemination in time demonstrated by an additional clinical attack or by MRI OR demonstration of CSF-specific ocbs                                                                                                                        |
|                      | 1                                                                                                                      | Dissemination in space demonstrated by an additional clinical attack implicating a different CNS site or by MRI AND<br>Dissemination in time demonstrated by an additional clinical attack or by MRI OR demonstration of CSF-specific ocbs |

### Supplementary table 1 - Diagnostic criteria of ALE and RRMS

1. Graus F, Titulaer MJ, Balu R, Benseler S, Bien CG, Cellucci T, et al. A clinical approach to diagnosis of autoimmune encephalitis. *Lancet Neurol.* 2016 Apr;15(4):391–404.
  2. Thompson AJ, Banwell BL, Barkhof F, Carroll WM, Coetzee T, Comi G et al. Diagnosis of multiple sclerosis: 2017 revisions of the McDonald criteria. *Lancet Neurol* 2018; 17: 162–173.
- ALE - autoimmune limbic encephalitis; CNS - central nervous system; CSF - cerebrospinal fluid; FLAIR - fluid-attenuated inversion recovery; Ig - immunoglobulin; MRI - magnetic resonance imaging; ocbs - oligoclonal bands; RRMS - relapsing-remitting multiple sclerosis*

| ID    | Sex | Age | Ab       | Ab target | Titer CSF | Titer serum | Grauss criteria | Signs and symptoms                                                                                                        | Comorbidities                                                  | IMD ast | Plex/IA* | Cortisone* | ACD ast | SED ast | EEG abnormal |
|-------|-----|-----|----------|-----------|-----------|-------------|-----------------|---------------------------------------------------------------------------------------------------------------------------|----------------------------------------------------------------|---------|----------|------------|---------|---------|--------------|
| ALE1  | f   | 27  | -        | -         | -         | -           | definite        | memory and attention deficits, seizures, emotional instability, depression                                                | no                                                             | no      | no       | no         | yes     | no      | yes          |
| ALE2  | f   | 64  | DPPX     | extra     | 1:1       | 1:1000      | definite        | memory deficits, autonomic dysfunction, diarrhea, weight loss, nystagmus, gait disturbance, vertigo, diplopia, depression | diabetes, hypothyroidism                                       | no      | no       | no         | no      | no      | no           |
| ALE3  | f   | 23  | -        | -         | -         | -           | definite        | memory deficits, seizures                                                                                                 | s/p ALL                                                        | no      | no       | yes        | yes     | no      | yes          |
| ALE4  | m   | 80  | Hu       | intra     | 1:100     | 1:1000      | possible        | memory deficits, disorientation, depression, speech disturbances, seizures                                                | SCLC, afib, hypertension, PAD                                  | no      | no       | no         | no      | no      | yes          |
| ALE5  | m   | 47  | GAD65    | intra     | 1:100     | 1:1000      | possible        | memory deficits, seizures, emotional instability, anxiety                                                                 | adrenal adenoma, hypertension, obesity, OSAS                   | no      | no       | no         | yes     | no      | no           |
| ALE6  | m   | 65  | CASPR2   | extra     | 1:320     | 1:3200      | possible        | memory deficits, disorientation, seizures, formal thought disorder, infringing personal space                             | CTS, s/p stroke, diabetes, hypertension, COPD                  | no      | no       | no         | yes     | no      | yes          |
| ALE7  | m   | 67  | -        | -         | -         | -           | definite        | memory deficits, seizures, depression                                                                                     | PNP, hypertension                                              | no      | no       | no         | no      | no      | yes          |
| ALE8  | f   | 17  | -        | -         | -         | -           | possible        | seizures, depression                                                                                                      | hypothyroidism                                                 | no      | no       | no         | yes     | no      | yes          |
| ALE9  | f   | 48  | -        | -         | -         | -           | definite        | memory deficits, disorientation, psychomotor retardation, seizures, psychosis, autonomic dysfunction                      | hypothyroidism, hypertension, bipolar disorder, obesity        | no      | no       | yes        | yes     | no      | yes          |
| ALE10 | m   | 66  | -        | -         | -         | -           | probable        | memory deficit, psychomotor retardation, depression                                                                       | bipolar disorder, diabetes, hypertension, PNP                  | no      | no       | no         | no      | no      | no           |
| ALE11 | f   | 53  | GAD65    | intra     | 1:10      | 1:320       | definite        | memory deficits, seizures                                                                                                 | diabetes, rosacea                                              | no      | no       | no         | yes     | no      | no           |
| ALE12 | m   | 53  | -        | -         | -         | -           | probable        | memory deficits, depression                                                                                               | hypothyroidism                                                 | no      | no       | no         | no      | yes     | yes          |
| ALE13 | m   | 50  | LGI1     | extra     | neg.      | 1:32        | possible        | memory deficits, disorientation, seizures, anxiety, infringing personal space                                             | asthma                                                         | no      | no       | no         | yes     | no      | yes          |
| ALE14 | m   | 41  | GAD65    | intra     | 1:3.2     | 1:1000      | possible        | memory deficits, disorientation, seizures                                                                                 | no                                                             | no      | no       | yes        | no      | yes     |              |
| ALE15 | m   | 44  | -        | -         | -         | -           | definite        | memory deficits, seizures                                                                                                 | no                                                             | no      | no       | yes        | no      | yes     |              |
| ALE16 | f   | 49  | unknown  | unknown   | 1:320     | neg.        | possible        | memory deficits, seizures, depression                                                                                     | PNP, hashimoto thyroiditis, migraine, hypertension             | no      | no       | no         | yes     | no      | yes          |
| ALE17 | m   | 64  | -        | -         | -         | -           | definite        | memory deficits, disorientation, seizures                                                                                 | s/p PE                                                         | no      | no       | yes        | yes     | no      | no           |
| ALE18 | f   | 59  | Hu       | intra     | 1:320     | 1:10000     | definite        | depression, anxiety, hallucinations                                                                                       | COPD, hypertension                                             | no      | no       | no         | no      | yes     | no           |
| ALE19 | m   | 52  | -        | -         | -         | -           | definite        | seizures, depression                                                                                                      | asthma                                                         | no      | no       | no         | yes     | no      | no           |
| ALE20 | m   | 67  | -        | -         | -         | -           | definite        | memory deficit, seizures, depression                                                                                      | s/p lymphoma, s/p testicular cancer                            | no      | no       | no         | yes     | no      | yes          |
| ALE21 | m   | 70  | -        | -         | -         | -           | possible        | memory deficits, seizures, impulsive behavior, depression                                                                 | s/p stroke, hypertension                                       | no      | no       | no         | no      | no      | yes          |
| ALE22 | m   | 53  | -        | -         | -         | -           | definite        | memory deficits, seizures, autonomic dysfunction                                                                          | no                                                             | no      | no       | no         | no      | no      | no           |
| ALE23 | f   | 43  | GAD65    | intra     | 1:10      | 1:100       | definite        | memory deficits, seizures, depression                                                                                     | no                                                             | no      | no       | no         | no      | no      | yes          |
| ALE24 | m   | 51  | GABA-A-R | intra     | neg.      | 1:10        | definite        | memory deficits, seizures, psychosis, psychomotor retardation                                                             | s/p stroke, hypertension, adrenal adenoma, OSAS, asthma        | no      | yes      | no         | yes     | no      | yes          |
| ALE25 | f   | 61  | -        | -         | -         | -           | possible        | memory deficits, seizures                                                                                                 | hypertension, hypothyroidism, afib, OSAS, buccal mucosa cancer | no      | no       | no         | no      | no      | yes          |

| ID    | Sex | Age | Ab       | Ab target | Titer CSF | Titer serum | Grauss criteria | Signs and symptoms                                                                             | Comorbidities                                                                     | IMD ast | Plex/IA* | Cortisone* | ACD ast | SED ast | EEG abnormal |
|-------|-----|-----|----------|-----------|-----------|-------------|-----------------|------------------------------------------------------------------------------------------------|-----------------------------------------------------------------------------------|---------|----------|------------|---------|---------|--------------|
| ALE26 | m   | 74  | LGI1     | extra     | neg.      | 1:1000      | definite        | memory deficits, disorientation, seizures, speech disturbances, autonomic dysfunction, apraxia | CAD, s/p TIA, VaD, diabetes, hypertension                                         | no      | no       | no         | no      | no      | yes          |
| ALE27 | m   | 58  | -        | -         | -         | -           | possible        | seizures                                                                                       | depression, PNP                                                                   | no      | no       | no         | yes     | no      | yes          |
| ALE28 | f   | 60  | GAD65    | intra     | 1:100     | 1:100       | possible        | memory deficits, seizures, depression                                                          | s/p thymoma, hypertension, meningioma                                             | no      | no       | no         | yes     | no      | yes          |
| ALE29 | m   | 45  | -        | -         | -         | -           | possible        | memory deficits, seizures                                                                      | hypertension                                                                      | no      | no       | no         | no      | no      | yes          |
| ALE30 | f   | 67  | GAD65    | intra     | 1:1       | 1:1000      | definite        | memory deficits, psychomotor retardation, emotional instability, seizures                      | s/p hashimoto thyroiditis, vitiligo                                               | no      | no       | no         | na      | na      | yes          |
| ALE31 | f   | 56  | GABA-B-R | extra     | neg.      | 1:10        | definite        | seizures                                                                                       | ITP                                                                               | no      | no       | no         | yes     | no      | yes          |
| ALE32 | f   | 22  | -        | -         | -         | -           | definite        | seizures                                                                                       | depression                                                                        | no      | no       | no         | yes     | no      | yes          |
| ALE33 | m   | 59  | -        | -         | -         | -           | possible        | memory deficits, seizures, psychosis, impulsive behavior, speech disturbances                  | OSAS, depression                                                                  | no      | no       | no         | yes     | no      | yes          |
| ALE34 | m   | 33  | GAD65    | intra     | 1:3.2     | 1:100       | possible        | psychomotor retardation, seizures, emotional instability, depression                           | chronic sinusitis                                                                 | no      | no       | yes        | yes     | no      | no           |
| ALE35 | m   | 66  | CASPR2   | extra     | 1:320     | 1:3200      | possible        | memory deficits, seizures                                                                      | PAD, hypothyroidism                                                               | no      | no       | no         | yes     | no      | yes          |
| ALE36 | m   | 53  | -        | -         | -         | -           | definite        | memory deficits, psychomotor retardation, depression, personality changes                      | hypertension, diabetes, obesity, COPD, OSAS, cardiomyopathy, hypercholesterolemia | no      | no       | no         | no      | no      | no           |
| ALE37 | m   | 53  | -        | -         | -         | -           | definite        | memory deficits, seizures                                                                      | no                                                                                | no      | no       | no         | na      | na      | yes          |
| ALE38 | f   | 49  | -        | -         | -         | -           | definite        | memory deficits                                                                                | hypertension                                                                      | no      | no       | no         | yes     | no      | yes          |
| ALE39 | m   | 54  | CASPR2   | extra     | 1:320     | 1:3200      | definite        | memory deficits, seizures                                                                      | no                                                                                | no      | no       | no         | no      | no      | yes          |
| ALE40 | f   | 55  | -        | -         | -         | -           | possible        | memory deficits, seizures, depression                                                          | PLMS                                                                              | no      | no       | no         | yes     | no      | yes          |
| ALE41 | m   | 44  | -        | -         | -         | -           | definite        | seizures, impulsive behavior, depression                                                       | thrombophilia, s/p PME and DVT, s/p testicular cancer, aortic stenosis            | no      | no       | no         | yes     | no      | yes          |
| ALE42 | f   | 59  | GAD65    | intra     | neg.      | 1:100       | definite        | memory deficits, seizures, infringing personal space, depression                               | chronic headache, s/p PME and DVT, cholecystolithiasis, urolithiasis              | no      | no       | no         | yes     | no      | yes          |
| ALE43 | f   | 61  | -        | -         | -         | -           | possible        | memory deficits, emotional instability, depression                                             | chronic tension-type headache                                                     | no      | no       | no         | no      | no      | yes          |
| ALE44 | m   | 64  | unknown  | unknown   | neg.      | 1:1000      | definite        | memory deficits, psychomotor retardation, seizures, emotional instability, depression, apraxia | CAD, emphysema, s/p duodenal ulcers                                               | no      | no       | no         | no      | no      | no           |
| ALE45 | f   | 71  | LGI1     | extra     | neg.      | 1:100       | definite        | memory deficits, seizures, autonomic dysfunction                                               | CAD, diabetes, hypertension, hypothyroidism                                       | no      | no       | no         | yes     | no      | yes          |
| ALE46 | m   | 49  | LGI1     | extra     | 1:1       | 1:1000      | definite        | memory deficits, seizures                                                                      | no                                                                                | no      | yes      | no         | no      | yes     |              |
| ALE47 | m   | 75  | -        | -         | -         | -           | definite        | memory deficits, psychomotor retardation, seizures, personality changes                        | PNP                                                                               | no      | no       | no         | no      | no      | yes          |
| ALE48 | f   | 76  | LGI1     | extra     | 1:1       | 1:1000      | possible        | memory deficits, seizures, depression, personality changes                                     | hypertension, goiter                                                              | no      | no       | no         | yes     | no      | yes          |

| ID    | Sex | Age | Ab                  | Ab target | Titer CSF | Titer serum | Grauss criteria | Signs and symptoms                                                                                             | Comorbidities                                                             | IMD ast | Plex/IA* | Cortisone* | ACD ast | SED ast | EEG abnormal |
|-------|-----|-----|---------------------|-----------|-----------|-------------|-----------------|----------------------------------------------------------------------------------------------------------------|---------------------------------------------------------------------------|---------|----------|------------|---------|---------|--------------|
| ALE49 | m   | 56  | GABA-B-R            | extra     | neg.      | 1:10        | definite        | memory deficits, psychomotor retardation, seizures, infringing personal space                                  | no                                                                        | no      | no       | no         | yes     | no      | no           |
| ALE50 | m   | 58  | -                   | -         | -         | -           | definite        | memory deficits, psychomotor retardation, seizures, agitation, anxiety, depression                             | PNP, CAD, PAD                                                             | no      | no       | no         | yes     | no      | no           |
| ALE51 | m   | 22  | -                   | -         | -         | -           | definite        | seizures                                                                                                       | atopic dermatitis                                                         | no      | no       | no         | no      | no      | yes          |
| ALE52 | m   | 66  | LGI1                | extra     | 1:1       | 1:100       | possible        | memory deficits, disorientation, impulsive behavior, psychosis, apraxia                                        | Parkinson disease, Graves disease                                         | no      | no       | yes        | no      | yes     | yes          |
| ALE53 | f   | 71  | -                   | -         | -         | -           | possible        | memory deficits, seizures, impulsive behavior, anxiety, autonomic dysfunction                                  | hypertension, afib, goiter, renal angiomyolipoma                          | no      | no       | no         | yes     | no      | yes          |
| ALE54 | m   | 78  | LGI1                | extra     | 1:1       | 1:100       | definite        | memory deficits, disorientation, psychomotor retardation, emotional instability, seizures, speech disturbances | hypertension, OSAS, heart failure                                         | no      | no       | yes        | yes     | yes     | no           |
| ALE55 | f   | 68  | -                   | -         | -         | -           | possible        | seizures, impulsive behavior, anxiety                                                                          | s/p DVT                                                                   | no      | no       | yes        | yes     | no      | yes          |
| ALE56 | f   | 61  | -                   | -         | -         | -           | possible        | seizures, emotional instability, depression, speech disturbances                                               | hypothyroidism                                                            | no      | no       | no         | yes     | yes     | yes          |
| ALE57 | f   | 35  | GAD65               | intra     | na        | na          | definite        | memory deficits, seizures, depression, personality changes, speech disturbances                                | hypothyroidism, diabetes                                                  | no      | no       | no         | yes     | no      | yes          |
| ALE58 | m   | 63  | MaTa                | intra     | 1:10      | 1:10        | definite        | memory deficits, disorientation, personality changes, depression, apraxia                                      | heart failure, s/p PME and DVT, COPD, diabetes, hypertension, fatty liver | no      | no       | yes        | yes     | yes     | yes          |
| ALE59 | m   | 41  | VGKC                | extra     | neg.      | 1:64        | definite        | memory deficits, seizures, infringing personal space                                                           | amblyopia, strabismus, cataract                                           | no      | no       | no         | yes     | no      | yes          |
| ALE60 | f   | 57  | GAD65               | intra     | 1:10      | 1:1000      | definite        | memory deficits, seizures                                                                                      | PNP, hypertension                                                         | no      | no       | no         | yes     | no      | yes          |
| ALE61 | m   | 53  | Neurexin-3α         | extra     | 1:1       | 1:100       | definite        | memory deficits, disorientation, seizures, depression, psychosis, parkinsonism                                 | s/p DVT, hypertension                                                     | no      | no       | no         | no      | yes     | no           |
| ALE62 | m   | 61  | -                   | -         | -         | -           | definite        | memory deficits, seizures, depression                                                                          | no                                                                        | no      | no       | no         | no      | no      | yes          |
| ALE63 | m   | 71  | Hu, Sox<br>Zic4, Yo | intra     | na        | na          | possible        | memory deficits, disorientation, agitation, seizures, ataxia, hypoesthesia, dysesthesia                        | SCLC, COPD, urothelial carcinoma                                          | no      | no       | yes        | yes     | no      | yes          |
| ALE64 | f   | 74  | MaTa                | intra     | na        | na          | possible        | memory deficits, impulsive behavior, psychomotor retardation, speech disturbances                              | s/p breast cancer, goiter, osteoporosis, pituitary adenoma                | no      | no       | no         | yes     | no      | yes          |
| ALE65 | f   | 64  | -                   | -         | -         | -           | possible        | memory deficits, disorientation, seizures, depression, speech disturbances                                     | s/p stroke, PNP, CAD, hypertension                                        | no      | no       | no         | yes     | no      | yes          |
| ALE66 | f   | 63  | LGI1                | extra     | na        | 1:100       | definite        | memory deficits, disorientation, seizures, infringing personal space, formal thought disorder                  | no                                                                        | no      | no       | yes        | yes     | yes     | no           |
| ALE67 | f   | 54  | LGI1                | extra     | neg.      | 1:10        | definite        | memory deficits, seizures, depression, personality changes                                                     | ovarian cancer, hypertension                                              | no      | no       | yes        | no      | no      | no           |
| ALE68 | m   | 74  | -                   | -         | -         | -           | definite        | memory deficits, depression, hypoesthesia/paranesthesia                                                        | s/p stroke, s/p herpes zoster, hypertension, s/p MI, OSAS, MUGS           | no      | no       | no         | no      | no      | no           |

| ID    | Sex | Age | Ab        | Ab target | Titer CSF | Titer serum | Grauss criteria | Signs and symptoms                                                                                     | Comorbidities                                                                                             | IMD ast | Plex/IA* | Cortisone* | ACD ast | SED ast | EEG abnormal |
|-------|-----|-----|-----------|-----------|-----------|-------------|-----------------|--------------------------------------------------------------------------------------------------------|-----------------------------------------------------------------------------------------------------------|---------|----------|------------|---------|---------|--------------|
| ALE69 | f   | 68  | -         | -         | -         | -           | definite        | memory deficits, psychomotor retardation, seizures                                                     | s/p encephalitis of unknown origin, depressive episode, PNP, CTS, hypertension, goiter, s/p herpes zoster | no      | no       | no         | yes     | no      | yes          |
| ALE70 | m   | 69  | LG11      | extra     | 1:1       | 1:320       | definite        | memory deficits, disorientation, seizures, depression, speech disturbances, autonomic dysfunction      | CAD, hypertension                                                                                         | no      | no       | no         | yes     | no      | no           |
| ALE71 | m   | 53  | -         | -         | -         | -           | probable        | psychomotor retardation, speech disturbances                                                           | hypertension, s/p acute hepatitis B, s/p testicular cancer, CKid                                          | no      | no       | no         | no      | no      | yes          |
| ALE72 | f   | 48  | -         | -         | -         | -           | possible        | memory deficits, psychomotor retardation, seizures, depression, impulsive behavior, skew deviation     | s/p stroke                                                                                                | no      | no       | no         | yes     | no      | yes          |
| ALE73 | f   | 50  | -         | -         | -         | -           | definite        | memory deficits, seizures, infringing personal space, formal thought disorder, speech disturbances     | PNP, s/p DVT, asthma, migraine, chronic gastritis, colorectal adenomas                                    | no      | no       | no         | yes     | no      | yes          |
| ALE74 | f   | 56  | LG11      | extra     | 1:100     | 1:320       | possible        | memory deficits, disorientation, seizures, impulsive behavior, confabulations                          | s/p DVT                                                                                                   | no      | no       | no         | yes     | no      | yes          |
| ALE75 | m   | 76  | DPPX      | extra     | 1:32      | 1:10000     | definite        | memory deficits, disorientation, infringing personal space, depression, parkinsonism, gait disturbance | hypertension, s/p RCC                                                                                     | no      | no       | no         | no      | yes     | no           |
| ALE76 | f   | 21  | Yo, Ma/Ta | intra     | na        | na          | definite        | memory deficits, psychomotor retardation, seizures, infringing personal space                          | no                                                                                                        | no      | no       | no         | yes     | no      | yes          |
| ALE77 | m   | 57  | -         | -         | -         | -           | definite        | memory deficits, seizures, impulsive behavior, emotional instability                                   | no                                                                                                        | no      | no       | no         | yes     | no      | yes          |
| ALE78 | m   | 61  | -         | -         | -         | -           | definite        | seizures, speech disturbances                                                                          | AVNRT, s/p TIA, afib, hypertension, hypothyroidism                                                        | no      | no       | no         | no      | no      | yes          |
| ALE79 | f   | 29  | GFAP      | intra     | 1:32      | 1:100       | possible        | memory deficits, formal thought disorder                                                               | fibromyalgia                                                                                              | no      | no       | yes        | yes     | no      | yes          |
| ALE80 | m   | 43  | GAD65     | intra     | 1:10      | 1:1000      | definite        | memory deficits, seizures, autonomic dysfunction                                                       | asthma, s/p Graves disease                                                                                | no      | no       | yes        | yes     | no      | no           |
| ALE81 | m   | 27  | -         | -         | -         | -           | definite        | memory deficits, seizures, depression                                                                  | s/p thyroid cancer, s/p depressive episode, obesity                                                       | no      | no       | no         | yes     | no      | yes          |

**Supplementary table 2 - Basic demographic and disease characteristics of ALE patients**

*Ab - antibody; ACD - anticonvulsive drugs; afib - atrial fibrillation; ALE - autoimmune limbic encephalitis; AVNRT - AV nodal reentrant tachycardia; CAD - coronary artery disease; CASPR2 - contactin-associated protein-like 2; CKid - chronic kidney disease; cMRI - cranial magnetic resonance imaging; COPD - Chronic obstructive pulmonary disease; CTS - carpal tunnel syndrome; DPPX - dipeptidyl-peptidase-like protein 6; DVT - deep vein thrombosis; EEG - electroencephalography; extra - extracellular; GABA-A-R -  $\gamma$ -aminobutyric acid A receptor; GABA-B-R -  $\gamma$ -aminobutyric acid B receptor; GAD65 - 65 kDa isoform of the glutamic acid decarboxylase; GFAP - glial fibrillary acidic protein; IA - immunoadsorption; intra - Intracellular; IMD - immunomodulatory drug; ITP - isolated thrombocytopenia; LG11 - leucine-rich, glioma inactivated 1; MI - myocardial infarction; MUGS - monoclonal gammopathy of undetermined significance; OSAS - Obstructive sleep apnea syndrome; PAD - peripheral artery disease; PLEX - plasmapheresis; PLMS - Periodic limb movements of sleep; PME - pulmonary embolism; PNP - polyneuropathy; RCC - renal cell carcinoma; SCLC - small cell lung cancer; SED - sedative drugs; s/p - status post; TIA - Transient ischemic attack; VaD - vascular dementia; VGKC - voltage-gated potassium channel; ZIC4 - Zinc finger protein 4.*

*\* within 4 weeks before sample taking*

| <b>Patient ID</b> | <b>Sex</b> | <b>Age</b> | <b>Comorbidities</b> | <b>Previous DMT</b> | <b>Plex/IA within 4 w p.t.s.</b> | <b>Cortisone within 4 w p.t.s.</b> |
|-------------------|------------|------------|----------------------|---------------------|----------------------------------|------------------------------------|
| RRMS1             | f          | 49         | na                   | None                | No                               | No                                 |
| RRMS2             | f          | 61         | na                   | None                | No                               | No                                 |
| RRMS3             | f          | 38         | na                   | None                | No                               | No                                 |
| RRMS4             | f          | 26         | na                   | None                | No                               | No                                 |
| RRMS5             | f          | 25         | na                   | None                | No                               | No                                 |
| RRMS6             | f          | 32         | na                   | None                | No                               | No                                 |
| RRMS7             | f          | 45         | na                   | None                | No                               | No                                 |
| RRMS8             | f          | 23         | na                   | None                | No                               | No                                 |
| RRMS9             | f          | 33         | na                   | None                | No                               | No                                 |
| RRMS10            | f          | 22         | na                   | None                | No                               | No                                 |
| RRMS11            | f          | 25         | na                   | None                | No                               | No                                 |
| RRMS12            | f          | 47         | na                   | None                | No                               | No                                 |
| RRMS13            | m          | 17         | na                   | None                | No                               | No                                 |
| RRMS14            | f          | 45         | na                   | None                | No                               | No                                 |
| RRMS15            | f          | 51         | na                   | None                | No                               | No                                 |
| RRMS16            | m          | 24         | na                   | None                | No                               | No                                 |
| RRMS17            | f          | 29         | na                   | None                | No                               | No                                 |
| RRMS18            | f          | 30         | na                   | None                | No                               | No                                 |
| RRMS19            | f          | 29         | na                   | None                | No                               | No                                 |
| RRMS20            | m          | 23         | na                   | None                | No                               | No                                 |
| RRMS21            | f          | 28         | na                   | None                | No                               | No                                 |
| RRMS22            | m          | 29         | na                   | None                | No                               | No                                 |
| RRMS23            | m          | 31         | na                   | None                | No                               | No                                 |
| RRMS24            | m          | 23         | na                   | None                | No                               | No                                 |
| RRMS25            | f          | 30         | na                   | None                | No                               | No                                 |
| RRMS26            | f          | 24         | na                   | None                | No                               | No                                 |
| RRMS27            | m          | 19         | na                   | None                | No                               | No                                 |
| RRMS28            | m          | 28         | na                   | None                | No                               | No                                 |
| RRMS29            | m          | 25         | na                   | None                | No                               | No                                 |
| RRMS30            | f          | 47         | na                   | None                | No                               | No                                 |
| RRMS31            | f          | 47         | na                   | None                | No                               | No                                 |
| RRMS32            | f          | 21         | na                   | None                | No                               | No                                 |
| RRMS33            | f          | 36         | na                   | None                | No                               | No                                 |
| RRMS34            | f          | 30         | na                   | None                | No                               | No                                 |
| RRMS35            | f          | 40         | na                   | None                | No                               | No                                 |
| RRMS36            | m          | 25         | na                   | None                | No                               | No                                 |
| RRMS37            | f          | 28         | na                   | None                | No                               | No                                 |
| RRMS38            | f          | 55         | na                   | None                | No                               | No                                 |
| RRMS39            | f          | 24         | na                   | None                | No                               | No                                 |

| <b>Patient ID</b> | <b>Sex</b> | <b>Age</b> | <b>Comorbidities</b> | <b>Previous DMT</b> | <b>Plex/IA within 4 w p.t.s.</b> | <b>Cortisone within 4 w p.t.s.</b> |
|-------------------|------------|------------|----------------------|---------------------|----------------------------------|------------------------------------|
| RRMS40            | f          | 25         | na                   | None                | No                               | No                                 |
| RRMS41            | f          | 32         | na                   | None                | No                               | No                                 |
| RRMS42            | f          | 23         | na                   | None                | No                               | No                                 |
| RRMS43            | m          | 42         | na                   | None                | No                               | No                                 |
| RRMS44            | f          | 25         | na                   | None                | No                               | No                                 |
| RRMS45            | f          | 44         | na                   | None                | No                               | No                                 |
| RRMS46            | f          | 31         | na                   | None                | No                               | No                                 |
| RRMS47            | m          | 22         | na                   | None                | No                               | No                                 |
| RRMS48            | f          | 18         | na                   | None                | No                               | No                                 |
| RRMS49            | f          | 19         | na                   | None                | No                               | No                                 |
| RRMS50            | m          | 24         | na                   | None                | No                               | No                                 |
| RRMS51            | f          | 37         | na                   | None                | No                               | No                                 |
| RRMS52            | f          | 52         | na                   | None                | No                               | No                                 |
| RRMS53            | f          | 21         | na                   | None                | No                               | No                                 |
| RRMS54            | m          | 55         | na                   | None                | No                               | No                                 |
| RRMS55            | f          | 52         | na                   | None                | No                               | No                                 |
| RRMS56            | f          | 16         | na                   | None                | No                               | No                                 |
| RRMS57            | f          | 31         | na                   | None                | No                               | No                                 |
| RRMS58            | f          | 32         | na                   | None                | No                               | No                                 |
| RRMS59            | m          | 27         | na                   | None                | No                               | No                                 |
| RRMS60            | f          | 16         | na                   | None                | No                               | No                                 |
| RRMS61            | f          | 32         | na                   | None                | No                               | No                                 |
| RRMS62            | f          | 38         | na                   | None                | No                               | No                                 |
| RRMS63            | f          | 25         | na                   | None                | No                               | No                                 |
| RRMS64            | m          | 30         | na                   | None                | No                               | No                                 |
| RRMS65            | f          | 50         | na                   | None                | No                               | No                                 |
| RRMS66            | f          | 43         | na                   | None                | No                               | No                                 |
| RRMS67            | f          | 28         | na                   | None                | No                               | No                                 |
| RRMS68            | f          | 35         | na                   | None                | No                               | No                                 |
| RRMS69            | m          | 35         | na                   | None                | No                               | No                                 |
| RRMS70            | f          | 29         | na                   | None                | No                               | No                                 |
| RRMS71            | f          | 41         | na                   | None                | No                               | No                                 |
| RRMS72            | f          | 21         | na                   | None                | No                               | No                                 |
| RRMS73            | f          | 45         | na                   | None                | No                               | No                                 |
| RRMS74            | f          | 42         | na                   | None                | No                               | No                                 |
| RRMS75            | f          | 27         | na                   | None                | No                               | No                                 |
| RRMS76            | m          | 25         | na                   | None                | No                               | No                                 |
| RRMS77            | f          | 18         | na                   | None                | No                               | No                                 |
| RRMS78            | f          | 20         | na                   | None                | No                               | No                                 |

| <b>Patient ID</b> | <b>Sex</b> | <b>Age</b> | <b>Comorbidities</b> | <b>Previous DMT</b> | <b>Plex/IA within 4 w p.t.s.</b> | <b>Cortisone within 4 w p.t.s.</b> |
|-------------------|------------|------------|----------------------|---------------------|----------------------------------|------------------------------------|
| RRMS79            | f          | 29         | na                   | None                | No                               | No                                 |
| RRMS80            | f          | 23         | na                   | None                | No                               | No                                 |
| RRMS81            | m          | 18         | na                   | None                | No                               | No                                 |
| RRMS82            | m          | 45         | na                   | None                | No                               | No                                 |
| RRMS83            | f          | 24         | na                   | None                | No                               | No                                 |
| RRMS84            | m          | 28         | na                   | None                | No                               | No                                 |
| RRMS85            | f          | 24         | na                   | None                | No                               | No                                 |
| RRMS86            | f          | 21         | na                   | None                | No                               | No                                 |
| RRMS87            | f          | 47         | na                   | None                | No                               | No                                 |
| RRMS88            | f          | 42         | na                   | None                | No                               | No                                 |
| RRMS89            | f          | 41         | na                   | None                | No                               | No                                 |
| RRMS90            | f          | 22         | na                   | None                | No                               | No                                 |
| RRMS91            | m          | 47         | na                   | None                | No                               | No                                 |
| RRMS92            | f          | 26         | na                   | None                | No                               | No                                 |
| RRMS93            | m          | 29         | na                   | None                | No                               | No                                 |
| RRMS94            | m          | 20         | na                   | None                | No                               | No                                 |
| RRMS95            | f          | 27         | na                   | None                | No                               | No                                 |
| RRMS96            | f          | 21         | na                   | None                | No                               | No                                 |
| RRMS97            | f          | 43         | na                   | None                | No                               | No                                 |
| RRMS98            | f          | 34         | na                   | None                | No                               | No                                 |
| RRMS99            | f          | 37         | na                   | None                | No                               | No                                 |
| RRMS100           | f          | 25         | na                   | None                | No                               | No                                 |
| RRMS101           | m          | 29         | na                   | None                | No                               | No                                 |
| RRMS102           | f          | 41         | na                   | None                | No                               | No                                 |
| RRMS103           | f          | 44         | na                   | None                | No                               | No                                 |
| RRMS104           | m          | 44         | na                   | None                | No                               | No                                 |
| RRMS105           | f          | 50         | na                   | None                | No                               | No                                 |
| RRMS106           | f          | 25         | na                   | None                | No                               | No                                 |
| RRMS107           | f          | 36         | na                   | None                | No                               | No                                 |
| RRMS108           | f          | 26         | na                   | None                | No                               | No                                 |
| RRMS109           | f          | 46         | na                   | None                | No                               | No                                 |
| RRMS110           | f          | 33         | na                   | None                | No                               | No                                 |
| RRMS111           | m          | 32         | na                   | None                | No                               | No                                 |
| RRMS112           | f          | 34         | na                   | None                | No                               | No                                 |
| RRMS113           | m          | 49         | na                   | None                | No                               | No                                 |
| RRMS114           | f          | 31         | na                   | None                | No                               | No                                 |
| RRMS115           | f          | 31         | na                   | None                | No                               | No                                 |
| RRMS116           | f          | 30         | na                   | None                | No                               | No                                 |
| RRMS117           | f          | 42         | na                   | None                | No                               | No                                 |



| Patient ID | Sex | Age | Comorbidities                                            | Previous DMT | Plex/IA within 4 w p.t.s. | Cortisone within 4 w p.t.s. |
|------------|-----|-----|----------------------------------------------------------|--------------|---------------------------|-----------------------------|
| RRMS118    | m   | 27  | na                                                       | None         | No                        | No                          |
| RRMS119    | m   | 50  | na                                                       | None         | No                        | No                          |
| RRMS120    | m   | 25  | na                                                       | None         | No                        | No                          |
| RRMS121    | f   | 48  | na                                                       | None         | No                        | No                          |
| RRMS122    | f   | 16  | na                                                       | None         | No                        | No                          |
| RRMS123    | f   | 49  | na                                                       | None         | No                        | No                          |
| RRMS124    | m   | 40  | na                                                       | None         | No                        | No                          |
| RRMS125    | m   | 43  | na                                                       | None         | No                        | No                          |
| RRMS126    | f   | 27  | na                                                       | None         | No                        | No                          |
| RRMS127    | m   | 15  | na                                                       | None         | No                        | No                          |
| RRMS128    | m   | 33  | na                                                       | None         | No                        | No                          |
| RRMS129    | m   | 52  | na                                                       | None         | No                        | No                          |
| RRMS130    | f   | 32  | na                                                       | None         | No                        | No                          |
| RRMS131    | m   | 33  | na                                                       | None         | No                        | No                          |
| RRMS132    | f   | 26  | na                                                       | None         | No                        | No                          |
| RRMS133    | f   | 32  | na                                                       | None         | No                        | No                          |
| RRMS134    | f   | 18  | na                                                       | None         | No                        | No                          |
| RRMS135    | m   | 28  | na                                                       | None         | No                        | No                          |
| RRMS136    | m   | 21  | na                                                       | None         | No                        | No                          |
| RRMS137    | f   | 15  | na                                                       | None         | No                        | No                          |
| RRMS138    | f   | 23  | na                                                       | None         | No                        | No                          |
| RRMS139    | f   | 20  | na                                                       | None         | No                        | No                          |
| RRMS140    | m   | 26  | na                                                       | None         | No                        | No                          |
| RRMS141    | f   | 24  | na                                                       | None         | No                        | No                          |
| RRMS142    | f   | 46  | na                                                       | None         | No                        | No                          |
| RRMS143    | f   | 47  | na                                                       | None         | No                        | No                          |
| RRMS144    | f   | 28  | na                                                       | None         | No                        | No                          |
| RRMS145    | f   | 29  | na                                                       | None         | No                        | No                          |
| RRMS146    | f   | 35  | na                                                       | None         | No                        | No                          |
| RRMS147    | f   | 24  | na                                                       | None         | No                        | No                          |
| RRMS148    | f   | 22  | na                                                       | None         | No                        | No                          |
| RRMS149    | m   | 39  | Depressive adjustment disorder                           | None         | No                        | No                          |
| RRMS150    | f   | 39  | Depression, anxiety disorder                             | None         | No                        | No                          |
| RRMS151    | f   | 57  | Disc herniation                                          | None         | No                        | No                          |
| RRMS152    | f   | 38  | S/p infectious mononucleosis in adolescence              | None         | No                        | No                          |
| RRMS153    | f   | 39  | None                                                     | None         | No                        | No                          |
| RRMS154    | f   | 46  | Hashimoto's thyroiditis                                  | None         | No                        | No                          |
| RRMS155    | f   | 45  | Vitamin D deficiency                                     | None         | No                        | No                          |
| RRMS156    | f   | 57  | Hashimoto's thyroiditis, migraine, arterial hypertension | None         | No                        | No                          |

| Patient ID | Sex | Age | Comorbidities                                                                                                                                      | Previous DMT | Plex/IA within 4 w p.t.s. | Cortisone within 4 w p.t.s. |
|------------|-----|-----|----------------------------------------------------------------------------------------------------------------------------------------------------|--------------|---------------------------|-----------------------------|
| RRMS157    | f   | 44  | None                                                                                                                                               | None         | No                        | No                          |
| RRMS158    | f   | 44  | Hashimoto's thyroiditis, ectopic pregnancy 2014, S/p. stomach reduction 01/2022, obesity                                                           | None         | No                        | No                          |
| RRMS159    | m   | 53  | Moderate outlet stenosis of the left subclavian artery, Vitamin D deficiency, adrenal adenoma, hypercholesterolemia                                | None         | No                        | No                          |
| RRMS160    | m   | 54  | Cataract, COPD, axonal PNP, arterial hypertension, s/p bladder cancer 2018, anxiety disorder                                                       | None         | No                        | No                          |
| RRMS161    | m   | 46  | Vitamin D deficiency                                                                                                                               | None         | No                        | No                          |
| RRMS162    | m   | 56  | S/P WPW syndrome, microangiopathy                                                                                                                  | None         | No                        | No                          |
| RRMS163    | m   | 41  | Os vesalianum right, symptomatic epilepsy                                                                                                          | None         | No                        | No                          |
| RRMS164    | m   | 36  | Alcohol use disorder, hip osteoarthritis                                                                                                           | None         | No                        | No                          |
| RRMS165    | m   | 53  | spinal canal stenosis C6/7 with myelonedema, radiculopathy lumbar spine                                                                            | None         | No                        | No                          |
| RRMS166    | f   | 55  | Asthma, arterial hypertension, s/p disc herniation, s/p mammary surgery, PNP                                                                       | None         | No                        | No                          |
| RRMS167    | f   | 54  | cervical disc protrusions, scoliosis                                                                                                               | None         | No                        | No                          |
| RRMS168    | f   | 57  | S/p total knee replacement, s/p spinal surgery, s/p cholecystectomy, eutyreotic goiter, s/p resection of giant cell tumor of the right digitus III | None         | No                        | No                          |

**Supplementary table 3 - Basic demographic and disease characteristics of RRMS patients**

*COPD - chronic obstructive pulmonary disease; DMT - disease modifying therapy; f - female; IA - immunoabsorption; m - male; PLEX - plasmapheresis; PNP - polyneuropathy; p.t.s. - prior to sampling; RRMS - relapsing-remitting multiple sclerosis; S/p - status post; w - weeks, WPW - Wolff–Parkinson–White*

| Patient-ID | Diagnosis              | Sex | Age | IDH    |                | ATRX expr. | Previous        | Steroids p.t.s | Comorbidities                                                                                                                                                                                                                      |
|------------|------------------------|-----|-----|--------|----------------|------------|-----------------|----------------|------------------------------------------------------------------------------------------------------------------------------------------------------------------------------------------------------------------------------------|
|            |                        |     |     | status | MGMT status    |            | tumor treatment |                |                                                                                                                                                                                                                                    |
| Glio-1     | Diffuse astrocytoma    | f   | 25  | WT     | Methylated     | No         | No              | No             | Polymorphic psychiatric disorder with schizoid symptoms                                                                                                                                                                            |
| Glio-2     | Diffuse astrocytoma    | f   | 56  | WT     | NA             | Yes        | No              | No             | S/p Alcohol use disorder                                                                                                                                                                                                           |
| Glio-3     | Glioblastoma           | f   | 21  | WT     | Non-methylated | Yes        | No              | No             | Symptomatic epilepsy                                                                                                                                                                                                               |
| Glio-4     | Diffuse astrocytoma    | f   | 42  | WT     | NA             | NA         | No              | No             | None                                                                                                                                                                                                                               |
| Glio-5     | Anaplastic astrocytoma | f   | 27  | WT     | Methylated     | Yes        | No              | No             | Hypothyroidism; s/p disc herniation, chronic gastritis                                                                                                                                                                             |
| Glio-6     | Glioblastoma           | m   | 58  | WT     | Non-methylated | Yes        | No              | No             | None                                                                                                                                                                                                                               |
| Glio-7     | Anaplastic astrocytoma | m   | 71  | WT     | Methylated     | Yes        | No              | No             | None                                                                                                                                                                                                                               |
| Glio-8     | Glioblastoma           | f   | 67  | WT     | Methylated     | NA         | No              | No             | S/p acute renal failure, recurrent hyperkalemia and hyponatremia, hypothyroidism, normochromic, normocytic anemia, pAD stage IV, s/p femoral neck fracture, s/p left hip joint replacement                                         |
| Glio-9     | Anaplastic astrocytoma | m   | 68  | WT     | Methylated     | NA         | No              | No             | None                                                                                                                                                                                                                               |
| Glio-10    | Glioblastoma           | m   | 22  | WT     | Non-methylated | Yes        | No              | No             | None                                                                                                                                                                                                                               |
| Glio-11    | Anaplastic astrocytoma | m   | 68  | WT     | Methylated     | Yes        | No              | No             | Diabetes mellitus type II, s/p acute renal failure, coronary artery disease, s/p myocardial infarction, chronic venous insufficiency, s/p ulcer cruris with MRSA detection, OSAS, s/p depressive episode, s/p basal cell carcinoma |
| Glio-12    | Glioblastoma           | m   | 54  | WT     | Methylated     | Yes        | No              | No             | S/p testicular cancer                                                                                                                                                                                                              |
| Glio-13    | Glioblastoma           | f   | 46  | WT     | Methylated     | NA         | No              | No             | None                                                                                                                                                                                                                               |
| Glio-14    | Glioblastoma           | f   | 54  | WT     | Methylated     | NA         | No              | No             | None                                                                                                                                                                                                                               |
| Glio-15    | Anaplastic astrocytoma | m   | 80  | WT     | Non-methylated | Yes        | No              | No             | Type C gastritis, arterial hypertension, s/p colon carcinoma                                                                                                                                                                       |
| Glio-16    | Anaplastic astrocytoma | m   | 45  | WT     | Non-methylated | No         | No              | No             | S/p oligodendroglioma, structural epilepsy, pulmonary sarcoidosis, s/p meningitis in childhood                                                                                                                                     |
| Glio-17    | Glioblastoma           | m   | 71  | WT     | Non-methylated | NA         | No              | No             | S/p appendectomy, arterial hypertension, goiter                                                                                                                                                                                    |
| Glio-18    | Glioblastoma           | f   | 80  | WT     | NA             | NA         | No              | No             | Symptomatic epilepsy, arterial hypertension, compensated heart failure                                                                                                                                                             |
| Glio-19    | Glioblastoma           | f   | 57  | WT     | NA             | NA         | No              | No             | S/p. herpes zoster, s/p bilateral hearing loss, s/p papilloma resection                                                                                                                                                            |

| Patient-ID | Diagnosis              | Sex | Age | IDH    |                | ATRX expr. | Previous        | Steroids p.t.s | Comorbidities                                                                                                                                                                                               |
|------------|------------------------|-----|-----|--------|----------------|------------|-----------------|----------------|-------------------------------------------------------------------------------------------------------------------------------------------------------------------------------------------------------------|
|            |                        |     |     | status | MGMT status    |            | tumor treatment |                |                                                                                                                                                                                                             |
| Glio-20    | Glioblastoma           | m   | 63  | WT     | Non-methylated | Yes        | No              | No             | S/p peripheral facial nerve palsy                                                                                                                                                                           |
| Glio-21    | Glioblastoma           | m   | 45  | WT     | Non-methylated | NA         | No              | No             | Symptomatic epilepsy, tumor of the distal esophagus without evidence of malignancy, s/p multiple lacunar cerebral infarcts, arterial hypertension, familial hypercholesterolemia, Diabetes mellitus type II |
| Glio-22    | Glioblastoma           | m   | 46  | WT     | Non-methylated | NA         | No              | No             | None                                                                                                                                                                                                        |
| Glio-23    | Glioblastoma           | m   | 63  | WT     | NA             | NA         | No              | No             | None                                                                                                                                                                                                        |
| Glio-24    | Glioblastoma           | m   | 57  | WT     | Methylated     | No         | No              | No             | S/p symptomatic epileptic seizure, s/p resection of benign neoplasm of the lung, s/p DVT, s/p erysipelas                                                                                                    |
| Glio-25    | Glioblastoma           | f   | 68  | WT     | Methylated     | Yes        | No              | No             | symptomatic epilepsy, irritable bowel syndrome, tendinitis                                                                                                                                                  |
| Glio-26    | Anaplastic astrocytoma | f   | 20  | WT     | NA             | Yes        | No              | No             | None                                                                                                                                                                                                        |
| Glio-27    | Glioblastoma           | m   | 76  | WT     | NA             | Yes        | No              | No             | Diabetes mellitus type 2, arterial hypertension, chronic pancreatitis, BPH, coronary artery disease                                                                                                         |
| Glio-28    | Glioblastoma           | f   | 85  | WT     | Non-methylated | Yes        | No              | No             | S/p pneumonia, symptomatic epilepsy, hypothyroidism, arterial hypertension, coronary artery disease, chronic renal insufficiency stage III, cerebral microangiopathy                                        |
| Glio-29    | Anaplastic astrocytoma | f   | 73  | WT     | Methylated     | Yes        | No              | No             | Parkinsonism, arterial hypertension, s/p bypass surgery                                                                                                                                                     |
| Glio-30    | Glioblastoma           | m   | 69  | WT     | Non-methylated | Yes        | No              | No             | Pulmonary fibrosis/pulmonary emphysema, hypothyroidism, hashimoto's thyroiditis, COPD, s/p partial gastric resection, hypercholesterolemia                                                                  |
| Glio-31    | Anaplastic astrocytoma | m   | 60  | WT     | Non-methylated | Yes        | No              | No             | S/p intestinal surgery after perforation                                                                                                                                                                    |
| Glio-32    | Glioblastoma           | f   | 52  | WT     | Methylated     | Yes        | No              | No             | Structural epilepsy, s/p eradication of helicobacter pylori, thyroid nodules                                                                                                                                |
| Glio-33    | Glioblastoma           | f   | 43  | WT     | Non-methylated | Yes        | No              | No             | Allergic rhinitis                                                                                                                                                                                           |
| Glio-34    | Glioblastoma           | m   | 82  | WT     | Non-methylated | Yes        | No              | No             | S/p epileptic seizure, s/p spinal ischemia, s/p cholecystectomy due to cholecystitis, s/p laryngeal cancer, s/p resection of adrenocortical adenoma, steatosis hepatis, s/p prostate cancer, splenomegaly   |
| Glio-35    | Glioblastoma           | m   | 47  | WT     | Non-methylated | Yes        | No              | Yes            | None                                                                                                                                                                                                        |
| Glio-36    | Glioblastoma           | m   | 69  | WT     | Methylated     | Yes        | No              | No             | Macrocytic hyperchromic polyglobulia, arterial hypertension, hypercholesterolemia, alcohol use disorder                                                                                                     |
| Glio-37    | Glioblastoma           | m   | 79  | WT     | Methylated     | Yes        | No              | No             | Prostate cancer, s/p DVT, hypothyroidism, BPH, s/p, prostatitis                                                                                                                                             |

| Patient-ID  | Diagnosis    | Sex | Age | IDH    |                | ATRX expr. | Previous        | Steroids p.t.s | Comorbidities                                                                                                                                                                                                                                                                                                                |
|-------------|--------------|-----|-----|--------|----------------|------------|-----------------|----------------|------------------------------------------------------------------------------------------------------------------------------------------------------------------------------------------------------------------------------------------------------------------------------------------------------------------------------|
|             |              |     |     | status | MGMT status    |            | tumor treatment |                |                                                                                                                                                                                                                                                                                                                              |
| Glio-38     | Glioblastoma | f   | 60  | WT     | Methylated     | Yes        | No              | No             | Arterial hypertension, asthma, hypothyroidism                                                                                                                                                                                                                                                                                |
| Glio-39     | Glioblastoma | m   | 61  | WT     | Methylated     | Yes        | No              | Yes            | None                                                                                                                                                                                                                                                                                                                         |
| Glio-40     | Glioblastoma | m   | 49  | WT     | Methylated     | Yes        | No              | No             | None                                                                                                                                                                                                                                                                                                                         |
| Glio-41     | Glioblastoma | f   | 70  | WT     | Methylated     | Yes        | No              | Yes            | Arterial hypertension                                                                                                                                                                                                                                                                                                        |
| Glio-42     | Glioblastoma | m   | 59  | WT     | Non-methylated | Yes        | No              | No             | Arterial hypertension                                                                                                                                                                                                                                                                                                        |
| Glio-43     | Glioblastoma | m   | 73  | WT     | Methylated     | Yes        | No              | Yes            | PAD stage IV on the left side, diabetes mellitus type II with diabetic foot syndrome, arterial hypertension, coronary artery disease, s/p aortocoronary venous bypass grafting, s/p myocardial infarction, carotid artery stenosis                                                                                           |
| Glio-44     | Glioblastoma | m   | 55  | WT     | Methylated     | Yes        | No              | Yes            | Glaucoma, arterial hypertension, GERD                                                                                                                                                                                                                                                                                        |
| Glio-45     | Glioblastoma | m   | 65  | WT     | Methylated     | Yes        | No              | Yes            | Coronary artery disease, pulmonary hypertension, hypertrophic cardiomyopathy, left bundle branch block, s/p PFO closure, s/p multiple cerebral infarcts, cerebral microangiopathy, carotid artery stenosis, COPD, OSAS, oesophagitis, type C gastritis, hyperuricemia, chronic renal insufficiency in stage II, s/p seizures |
| Glio-46     | Glioblastoma | f   | 57  | NA     | NA             | NA         | No              | No             | Arterial hypertension, migraine, mitral valve insufficiency                                                                                                                                                                                                                                                                  |
| Glio-47     | Glioblastoma | m   | 67  | WT     | Non-methylated | Yes        | No              | No             | Degenerative joint disease, metabolic syndrome, coronary artery disease, arterial hypertension, Barrett's esophagus, normocytic, normochromic anemia, s/p pneumonia, structural epilepsy                                                                                                                                     |
| Glio-48     | Glioblastoma | m   | 84  | WT     | Methylated     | Yes        | No              | Yes            | Arterial hypertension                                                                                                                                                                                                                                                                                                        |
| Glio-49     | Glioblastoma | m   | 86  | WT     | Methylated     | Yes        | No              | Yes            | Hyponatremia, arterial hypertension, normochromic, normocytic anemia, AV block I°, incomplete left bundle branch block, thiamine deficiency                                                                                                                                                                                  |
| Glio-50     | Glioblastoma | m   | 76  | WT     | Non-methylated | Yes        | No              | Yes            | Chronic pancreatitis, BPH, chronic renal insufficiency stage I, Schwartz-Bartter syndrome, s/p melanoma                                                                                                                                                                                                                      |
| Glio-51     | Glioblastoma | m   | 72  | WT     | Methylated     | Yes        | No              | No             | Mitral valve insufficiency I°, carotid artery stenosis, suspected post-inflammatory solitary pulmonary lesion                                                                                                                                                                                                                |
| CNS-DLBCL-1 | CNS-DLBCL    | m   | 69  | NA     | NA             | NA         | No              | No             | Symptomatic epilepsy, cerebral microangiopathy, antral gastritis, axial hiatal hernia, glycogen acanthosis, prostate cancer                                                                                                                                                                                                  |
| CNS-DLBCL-2 | CNS-DLBCL    | m   | 63  | NA     | NA             | NA         | No              | No             | None                                                                                                                                                                                                                                                                                                                         |
| CNS-DLBCL-3 | CNS-DLBCL    | f   | 75  | NA     | NA             | NA         | No              | No             | Arterial hypertension, hyperthyroidism, constipation                                                                                                                                                                                                                                                                         |

| Patient-ID  | Diagnosis | Sex | Age | IDH status | MGMT status | ATRX expr. | Previous        | Steroids p.t.s | Comorbidities                                                                                                                          |
|-------------|-----------|-----|-----|------------|-------------|------------|-----------------|----------------|----------------------------------------------------------------------------------------------------------------------------------------|
|             |           |     |     |            |             |            | tumor treatment |                |                                                                                                                                        |
| CNS-DLBCL-4 | CNS-DLBCL | m   | 61  | NA         | NA          | NA         | No              | No             | None                                                                                                                                   |
| CNS-DLBCL-5 | CNS-DLBCL | f   | 70  | NA         | NA          | NA         | No              | No             | Osteoarthritis, s/p knee replacement, hallux valgus, bilateral hearing loss, cerebral microangiopathy, dyslipoproteinemia, PNP, goiter |
| CNS-DLBCL-6 | CNS-DLBCL | m   | 71  | NA         | NA          | NA         | No              | No             | Lesion of the adrenal gland, MUGS, arterial hypertension, gout, s/p cataract surgery                                                   |
| CNS-DLBCL-7 | CNS-DLBCL | m   | 75  | NA         | NA          | NA         | No              | No             | Coronary artery disease with s/p stenting, hyperlipoproteinemia, AV block I°, arterial hypertension                                    |
| CNS-DLBCL-8 | CNS-DLBCL | m   | 85  | NA         | NA          | NA         | No              | No             | Arterial hypertension, Diabetes mellitus type 2, s/p central artery occlusion                                                          |
| CNS-DLBCL-9 | CNS-DLBCL | m   | 90  | NA         | NA          | NA         | No              | No             | Atrial fibrillation, arterial hypertension, hiatal hernia, s/p surgery for spinal canal stenosis, prostate cancer, PNP, scoliosis      |

**Supplementary table 4** - Basic demographic and disease characteristics of glioblastoma and CNS-DLBCL patients

ATRX - Alpha thalassemia/mental retardation syndrome X-linked; AV - atrioventricular block; BPH - Benign prostatic hyperplasia; CNS - central nervous system; CNS-DLBCL - diffuse large B cell lymphoma of the central nervous system; DM - Diabetes mellitus; DVT - deep vein thrombosis; expr. - expression; GERD - Gastroesophageal reflux disease, Glio - glioblastoma; f - female; IDH - Isocitrate dehydrogenase; m - male; MGMT - Methylated-DNA-protein-cysteine methyltransferase; MUGS - Monoclonal gammopathy of unknown significance; OSAS - Obstructive sleep apnea syndrome; PAD - Peripheral arterial disease; PFO - Patent foramen ovale; p.t.s. - prior to sampling; S/p - status post

| Panel                   | Tissue   | Analyzed cohort                                              | Antibodies (Clone, company)                                                                                                                                                                                                                                                                                                  | Analyzed cell population                                                                                                                                                                                                                                                                                                                                                                                                                                                                                                                                                                                                                                                                                                                                                                                                            |
|-------------------------|----------|--------------------------------------------------------------|------------------------------------------------------------------------------------------------------------------------------------------------------------------------------------------------------------------------------------------------------------------------------------------------------------------------------|-------------------------------------------------------------------------------------------------------------------------------------------------------------------------------------------------------------------------------------------------------------------------------------------------------------------------------------------------------------------------------------------------------------------------------------------------------------------------------------------------------------------------------------------------------------------------------------------------------------------------------------------------------------------------------------------------------------------------------------------------------------------------------------------------------------------------------------|
| Basic                   | PB & CSF | Basic mFC cohort (81 ALE, 147 RRMS, 33 IDH-WT-Glio, 9 PCNSL) | CD3 (UCHT1), CD4 (13B8.2), CD8 (B9.11), CD14 (RM052), CD16 (3G8), CD19 (J3-119), CD45 (J33), CD56 (N901), CD138 (B-A38), and HLA-DR (Immu-357) (all Beckman Coulter)                                                                                                                                                         | B cells, Mono, cMono, iMono, ncMono, Lympho, total T cells, CD4 <sup>+</sup> T cells, CD4 <sup>+</sup> CD8 <sup>+</sup> T cells, CD4 <sup>+</sup> HLA-DR <sup>+</sup> T cells, CD8 <sup>+</sup> T cells (CD8 <sup>+</sup> ), CD8 <sup>+</sup> HLADR <sup>+</sup> T cells, plasma cells, CD4 <sup>+</sup> /CD8 <sup>+</sup> ratio, Granulo, NK, NKT, NK dim, NK bright                                                                                                                                                                                                                                                                                                                                                                                                                                                               |
| In-depth 1 (B cell)     | PBMCs    | In-depth mFC cohort (20 RRMS, 18 GBM, 19 HC)                 | CD3 (SK7, Biolegend), CD56 (HCD56, Biolegend), CD14 (M5E2, Biolegend), HLA-DR (L243, Biolegend), CD19 (HIB19, Biolegend), IgD (IA6- 2, Biolegend), CD5 (UCHT2, Biolegend), CD38 (HB-7, Biolegend), CD138 (DL-101, Biolegend), CD20 (2H7, Biolegend), CD21 (Bu32, Biolegend), CD27 (M-T271, Biolegend), CD24 (ML5, Biolegend) | B cells, naive B cells, memory B cells, CD24 <sup>+</sup> /CD27 <sup>+</sup> Breg, CD24 <sup>+</sup> /CD38 <sup>+</sup> Breg, MZB, TZB, plasmablasts, plasma cells, MFIs: HLA-DR, CD5 on B cells                                                                                                                                                                                                                                                                                                                                                                                                                                                                                                                                                                                                                                    |
| In-depth 2 (Exhaustion) | PBMCs    | In-depth mFC cohort (20 RRMS, 18 GBM, 19 HC)                 | CD3 (SK7, Biolegend), CD8 (SK1, Biolegend), CD4 (SK3, Biolegend), CD19 (HIB19, Biolegend), CD20 (2H7, Biolegend), CD56 (HCD56, Biolegend), PD-1 (EH12.2H7, Biolegend), Tim-3 (F38-2E2, Biolegend), CTLA-4 (BNI3, Biolegend), TIGIT (A15153G, Biolegend)                                                                      | NK, NKT, CD4 <sup>+</sup> CD8 <sup>+</sup> Lympho, CD20 <sup>+</sup> Lympho<br>MFIs: TIGIT, Tim-3, PD-1, CTLA-4 on CD3 <sup>+</sup> Lympho, CD4 <sup>+</sup> Lympho, CD8 <sup>+</sup> Lympho, CD4 <sup>+</sup> CD8 <sup>+</sup> Lympho, NK, NKT                                                                                                                                                                                                                                                                                                                                                                                                                                                                                                                                                                                     |
| In-depth 3 (T cell I)   | PBMCs    | In-depth mFC cohort (20 RRMS, 18 GBM, 19 HC)                 | CD3 (SK7, Biolegend), HLA-DR (L243, Biolegend), CD28 (CD28.2, Biolegend), CD27 (M-T271, Biolegend), KLRG1 (14C2A07, Biolegend), CD8 (SK1, Biolegend), CD4 (SK3, Biolegend), CD197 (G043H7, Biolegend), CD57 (QA17A04, Biolegend), CD45RA ('HI100, Biolegend), CD95 (DX2, Biolegend)                                          | CD3 <sup>+</sup> Lympho, CD4 <sup>+</sup> Lympho, CD8 <sup>+</sup> Lympho, CD4 <sup>+</sup> naive T cells, CD4 <sup>+</sup> TSCM, CD4 <sup>+</sup> TCM, CD4 <sup>+</sup> TEM, CD4 <sup>+</sup> TTM, CD4 <sup>+</sup> TTE, CD8 <sup>+</sup> naive T cells, CD8 <sup>+</sup> TSCM, CD8 <sup>+</sup> TCM, CD8 <sup>+</sup> TEM, CD8 <sup>+</sup> TTM, CD8 <sup>+</sup> TTE, CD4 <sup>+</sup> CD8 <sup>+</sup> naive T cells, CD4 <sup>+</sup> CD8 <sup>+</sup> TSCM, CD4 <sup>+</sup> CD8 <sup>+</sup> TCM, CD4 <sup>+</sup> CD8 <sup>+</sup> TEM, CD4 <sup>+</sup> CD8 <sup>+</sup> TTM, CD4 <sup>+</sup> CD8 <sup>+</sup> TTE, sen. Lympho, sen. CD4 <sup>+</sup> , senescent CD8 <sup>+</sup><br>MFI: HLA-DR on CD3 <sup>+</sup> Lympho, CD4 <sup>+</sup> Lympho, CD8 <sup>+</sup> Lympho, CD4 <sup>+</sup> CD8 <sup>+</sup> Lympho |
| In-depth 4 (ILC & NK)   | PBMCs    | In-depth mFC cohort (20 RRMS, 18 GBM, 19 HC)                 | CD3 (SK7, Biolegend), CD14 (M5E2, Biolegend), CD19 (HIB19, Biolegend), CD335 (NKp46) (9E2, Biolegend), CD127 (A019D5, Biolegend), CD294 (CRTH2) (BM16, Biolegend), CD117 (104D2, Biolegend), CD11c (Bu15, Biolegend), CD16 (3G8, Biolegend), CD56 (HCD56, Biolegend), CD57 (QA17A04, Biolegend), CD123 (6H6, Biolegend)      | ILC1, ILC2, ILC3, alternative ILC, NK cells, NK bright, NK dim, CD57 <sup>+</sup> NK, DC, CD11c <sup>+</sup> CD56 <sup>+</sup>                                                                                                                                                                                                                                                                                                                                                                                                                                                                                                                                                                                                                                                                                                      |

| Panel                     | Tissue | Analyzed cohort                              | Antibodies (Clone, company)                                                                                                                                                                                                                                                          | Analyzed cell population                                                                                                                                                                                                                                                                                                                                                                                                                                                                                                                                              |
|---------------------------|--------|----------------------------------------------|--------------------------------------------------------------------------------------------------------------------------------------------------------------------------------------------------------------------------------------------------------------------------------------|-----------------------------------------------------------------------------------------------------------------------------------------------------------------------------------------------------------------------------------------------------------------------------------------------------------------------------------------------------------------------------------------------------------------------------------------------------------------------------------------------------------------------------------------------------------------------|
| In-depth 5<br>(Mono)      | PBMCs  | In-depth mFC cohort (20 RRMS, 18 GBM, 19 HC) | CD14 (M5E2, Biolegend), CD39 (A1, Biolegend), CD80 (2D10, Biolegend), CD86 (BU63, Biolegend), CD40 (5C3, Biolegend), HLA-DR (L243, Biolegend), CD206 (15-2, Biolegend), CD16 (3G8, Biolegend), CD195 (J418F1, Biolegend), CD192 (K036C2, Biolegend), CX3CR1 (2A9-1, Biolegend)       | cMono, iMono, ncMono, immature Mono, mature Mono, ag-Mono, non-ag-Mono, infil. Mono, CD80 <sup>+</sup> cMono, CD80 <sup>+</sup> iMono, CD80 <sup>+</sup> ncMono, CD86 <sup>+</sup> cMono, CD86 <sup>+</sup> iMono, CD86 <sup>+</sup> ncMono, CD206 <sup>+</sup> cMono, CD206 <sup>+</sup> iMono, CD206 <sup>+</sup> ncMono, CD39 <sup>+</sup> cMono, CD39 <sup>+</sup> iMono, CD39 <sup>+</sup> ncMono, CX3CR1 <sup>+</sup> cMono, CX3CR1 <sup>+</sup> iMono, CX3CR1 <sup>+</sup> ncMono<br>MFI: HLA-DR, CD80, CD86, CD206, CD39, CXCR1, CD40 on cMono, iMono, ncMono |
| In-depth 6<br>(T cell II) | PBMCs  | In-depth mFC cohort (20 RRMS, 18 GBM, 19 HC) | CD3 (SK7, Biolegend), CD8 (SK1, Biolegend), CD4 (SK3, Biolegend), CD183 (G025H7, Biolegend), CD25 (BC96, Biolegend), CCR10 (1B5, BD Biosciences), FoxP3 (PCH101, eBioscience), CD196 (G034E3, Biolegend) CD194 (L291H4, Biolegend), CD127 (A019D5, Biolegend), CD40 (5C3, Biolegend) | Th1, Th2, Th17, Th22, Th9, Th40, Treg                                                                                                                                                                                                                                                                                                                                                                                                                                                                                                                                 |

#### Supplementary table 5 - Overview of the used mFC panels

Ag - antigen-presenting; Altern - alternative; Breg - B regulatory cells; cMono - classical monocytes; CSF - cerebrospinal fluid; DC - dendritic cells; GBM - Glioblastoma multiforme; HC - healthy control; IDH-WT-Glio - IDH-wildtype glioma; ILC - innate lymphoid cells; iMono - intermediate monocytes; Infil. - infiltrating; Lympho - lymphocytes; mFC - multidimensional flow cytometry; MFI - mean fluorescence intensity; Mono - monocytes; MZB -Marginal zone like B cells; ncMono; non-classical monocytes; NK - natural killer cells; NK bright - CD56bright NK cells, NK dim - CD56dim NK cells, NKT - Natural killer T cells; PBMCs - peripheral blood mononuclear cells; PCNSL - primary CNS lymphoma ; RRMS - relapsing remitting multiple sclerosis; Sen - senescent; T - T cells; TCM - Central memory T cells; TEM - Effector memory T cells; Th - T helper cells; Treg - Regulatory T cells; TSCM - Stem memory T cells; TTE - terminal effector T cells; TZB - Transitional B cells.
